# Supplementary material for: Tat-hspb1 Suppresses Clear Cell Renal Cell Carcinoma (ccRCC) Growth via Lysosomal Membrane Permeabilization
Source: MDPI journal article supplement (doi:10.3390/cancers14225710), 2022-11-21
Supplement: s1 [file s1]

Table S2. Differentially expressed peptides

| Peptide Sequence              | Gene Name                              | Molecular Weight | Log2 FC    | P value    |
|-------------------------------|----------------------------------------|------------------|------------|------------|
| GDPNYLHRMTTL                  | PPP2R1A                                | 1416.682         | 5.67766676 | 0.00205534 |
| ELGYTVKKHLQDLSGRISR           | LRPAP1 A2MRAP                          | 2199.2124        | 5.90514613 | 0.04231093 |
| TGIFTDQVLSVLKGEE              | APOC2 APC2                             | 1734.904         | -4.5965447 | 0.04992282 |
| KLKLGQSVTTIPTVGF              | ARF6                                   | 1687.9873        | -2.4694816 | 0.02181921 |
| TATLRPYLSA                    | ARPC4 ARC20                            | 1091.5975        | 4.8065138  | 0.00302846 |
| SRIYHDGALR                    | ARPIN C15orf38                         | 1186.6207        | 2.68767481 | 0.02008305 |
| VPPVQVSPLIKLGRYSALF           | ATP5ME ATP5I<br>ATP5K                  | 2083.2194        | -2.3655474 | 0.01049308 |
| VPPVQVSPLIKLGRYSALFL          | ATP5ME ATP5I<br>ATP5K                  | 2196.3034        | -3.324978  | 0.04489413 |
| MDDFERRRELRL                  | CALD1 CAD CDM                          | 1521.747         | -1.9147675 | 0.03315676 |
| EGPIPEVLKNYMDAQY              | CTSD CPSD                              | 1865.887         | 5.78643953 | 0.03086903 |
| GPIPEVLKNYMDAQY               | CTSD CPSD                              | 1736.8444        | -2.178019  | 0.00424939 |
| KLVDQNIFS                     | CTSD CPSD                              | 1062.571         | 2.18342725 | 0.03617949 |
| VERQVFGEATKQPGIT              | CTSD CPSD                              | 1758.9264        | -2.1766193 | 0.0351754  |
| VSSFLPWIR                     | CTSG                                   | 1103.6128        | -8.0575442 | 0.01002414 |
| HSYSQMLLPY                    | CPA3                                   | 1384.6486        | -7.0614172 | 0.01319404 |
| QDLQKQVVY                     | CD68                                   | 1119.5924        | 3.45996631 | 0.00712208 |
| AGQAFRKFLPLFDRVLVERSA         | HSPE1                                  | 2419.3488        | -2.8000586 | 0.02304149 |
| AGQAFRKFLPLFDRVLVERSAAE<br>TV | HSPE1                                  | 2819.5446        | -7.8584308 | 0.02962995 |
| SNMEKHLFNLK                   | CHMP1B C18orf2                         | 1359.6969        | -1.5392297 | 0.00087304 |
| PITVTVPVEVSRKN                | CLU APOJ CLI<br>KUB1 AAG4              | 1537.8828        | -5.835052  | 0.00075405 |
| IEWNLSPVGRVTPKEWRNQ           | COX7B                                  | 2308.2076        | -5.7429767 | 0.01967085 |
| VGDEDFVH                      | CSTB CST6 STFB                         | 916.39266        | 7.3376869  | 0.00373521 |
| AAAAKPNNLVHVGPGDLRL<br>E NY   | SORD                                   | 2518.3292        | -3.6397948 | 0.0014406  |
| SSTLAKIAEIEAEMARTQKN          | DRG1 NEDD3                             | 2190.1314        | 5.28662178 | 0.01190173 |
| TTEVGSVSEVKKDS                | EPB41L2                                | 1464.7308        | -5.9088604 | 0.00247452 |
| AEYTRLHNALALIRLR              | EHHADH ECHD                            | 1909.101         | -2.8634944 | 0.02945852 |
| VNFTVDQIR                     | EEF2 EF2                               | 1090.5771        | 2.44922399 | 0.03321227 |
| SGPGLSPGMVR                   | FLNA FLN FLN1                          | 1056.5386        | -7.815948  | 0.03878548 |
| SSSHSRAGQSAAGAAP              | FLNA FLN FLN1                          | 1440.6706        | 2.54973275 | 0.03092987 |
| NDHFVKLISWY                   | GAPDH GAPD<br>CDABP0047<br>OK/SW-cl.12 | 1420.7139        | -7.9989607 | 0.03983395 |
| PYLLISTQIR                    | GCHFR GFRP                             | 1202.7023        | -6.3622352 | 0.03697474 |
| DTAKKPIIGILMQ                 | GGH                                    | 1426.8218        | -8.0983236 | 0.02149374 |
| DTAKKPIIGILMQKCRNK            | GGH                                    | 2056.1649        | -8.0349904 | 0.00393996 |

|                               |                                           |           |            |            |
|-------------------------------|-------------------------------------------|-----------|------------|------------|
| TMSLLAANNLLAGLRGEPMPSEL<br>KL | GRHPR GLXR<br>MSTP035                     | 2638.4186 | -3.8058907 | 0.02491768 |
| AFLASPEYVNLPIPINGNGKQ         | GSTP1 FAEES3<br>GST3                      | 2031.0425 | 3.73907954 | 0.02229884 |
| LKAFLASPEYVNLPIPINGNGKQ       | GSTP1 FAEES3<br>GST3                      | 2272.2216 | 4.77936577 | 0.00114134 |
| VGENADSQIKLSIK                | H1-0 H1F0 H1FV                            | 1500.8148 | -4.2215842 | 0.00480644 |
| SETAPAAPAAPAPAEKTPVKKK        | H1-4 H1F4<br>HIST1H1E                     | 2159.195  | -1.6332517 | 0.01960791 |
| SETAPAAPAAPAPAEKTPVKKKA<br>RK | H1-4 H1F4<br>HIST1H1E                     | 2514.4282 | -1.9828011 | 0.046213   |
| DALTNAVAHVDDMPN               | HBA1; HBA2                                | 1581.7093 | 5.05535494 | 0.02045441 |
| VLSPADKTNVKAAGWKVGA           | HBA1; HBA2                                | 1911.0578 | -2.2654815 | 0.04670935 |
| MLGMIKNS                      | HEBP1 HBP                                 | 892.45104 | -6.2760283 | 0.00089471 |
| PSSGLGVTKQDLGPVPM             | CD74 DHLAG                                | 1681.8709 | 2.04218712 | 0.00973222 |
| PAVAAPAYSRAISRQL              | HSPB1 HSP27<br>HSP28                      | 1669.9264 | -1.1027559 | 0.03454815 |
| RGPSWDPFDRWYPHSRLFDQAF<br>GL  | HSPB1 HSP27<br>HSP28                      | 2949.4099 | -3.8175667 | 0.0211277  |
| QIIQEKRGY                     | IFITM1 CD225 IFI17                        | 1133.6193 | -2.7587731 | 0.03642006 |
| GPASRSVETL                    | PKM OIP3 PK2 PK3<br>PKM2                  | 1015.5298 | 2.11158893 | 0.04202609 |
| VADTPENLRK                    | LASPI MLN50                               | 1254.6932 | 7.48544477 | 0.02326741 |
| SHSHMAETASPTPLN               | MS4A4A 4SPAN1<br>CD20L1 MS4A4<br>HDCME31P | 1578.7097 | 3.12337061 | 0.03381769 |
| GPIITVHPKEIRTF                | MAN2B2 KIAA0935                           | 1606.9195 | -7.423776  | 0.00031428 |
| AAAAELSLLEKSLGSKGNK           | EEF1E1 AIMP3 P18                          | 1999.1314 | -3.2090678 | 0.00775628 |
| AGVLKKTGLVG                   | NDUFA5                                    | 1142.7023 | -10.861695 | 0.00513615 |
| ASATRLIQLRNWASGHDQGL<br>LQL   | NDUFA7                                    | 2831.5631 | -2.1522029 | 0.00546259 |
| AGQPGHMPHGGSSN                | NEK6                                      | 1332.5629 | 1.59362839 | 0.02856801 |
| MLSYGERLGSPAVSPLVRGGHV<br>MR  | SLC34A1 NPT2<br>SLC17A2                   | 2665.3945 | -7.4244951 | 0.04737769 |
| MFPAAPSPRTPGTGSR              | NUP133                                    | 1628.8093 | 1.63218961 | 0.01271464 |
| AAAAAAAAAAGAAGGRGSGPG<br>RR   | PABPN1 PAB2<br>PABP2                      | 1864.9728 | -6.4569751 | 0.00227268 |
| ENVPEEGKVRSTPM                | PDZK1IP1 MAP17                            | 1700.8039 | -3.9363311 | 0.01152846 |
| AAVDELGKVLTPQV                | PEBP1 PBP PEBP                            | 1539.8508 | -2.4974218 | 0.02937675 |
| SLSNKLTLDKLDVKGRVV            | PGK1 PGKA MIG10<br>OK/SW-cl.110           | 2112.263  | 1.01117463 | 0.00056044 |
| ASVAVDPPQSVVTR                | PLIN2 ADFP                                | 1424.7623 | 3.9445329  | 0.03080169 |
| ASVAVDPPQSVVTRVV              | PLIN2 ADFP                                | 1622.8992 | 7.10804265 | 0.03185568 |

|                                |                                             |           |            |            |
|--------------------------------|---------------------------------------------|-----------|------------|------------|
| ASVAVDPQPSVVTRVVNLP            | PLIN2 ADFP                                  | 1947.0789 | 4.16243365 | 0.04602815 |
| GVENALTKSEL                    | PLIN2 ADFP                                  | 1159.6085 | 2.97524038 | 0.02938783 |
| GVENALTKSELL                   | PLIN2 ADFP                                  | 1272.6925 | 8.006299   | 0.02557071 |
| GVENALTKSELLVE                 | PLIN2 ADFP                                  | 1500.8035 | 2.49805975 | 0.00757893 |
| PQPSVVTRVVNLP                  | PLIN2 ADFP                                  | 1404.8089 | 5.97580954 | 0.04915835 |
| SGVENALTKSEL                   | PLIN2 ADFP                                  | 1246.6405 | 8.72210277 | 0.04467131 |
| SGVENALTKSELLVE                | PLIN2 ADFP                                  | 1587.8356 | 2.70321598 | 0.04172686 |
| VSSGVENALTKSELLVEQ             | PLIN2 ADFP                                  | 1901.9946 | 2.30435023 | 0.04175864 |
| TDYISKVKE                      | ARL6IP5 DERP11<br>JWA PRA2 PRAF3<br>HSPC127 | 1081.5655 | 8.18124387 | 0.00409668 |
| AGKQAVSASGKWLDGI               | UQCRB UQBP                                  | 1586.8417 | -6.0438036 | 0.0455667  |
| SRGPGAPASPSASHPQGLDTPK<br>PH   | ARHGAP4<br>KIAA0131 RGC1<br>RHOGAP4         | 2449.2098 | 5.59087481 | 0.02189178 |
| IIEPSLRQL                      | UBA52 UBCEP2                                | 1067.6339 | -6.2439444 | 0.02182805 |
| SVFALTNGIYPHKL                 | RPL6 TXREB1                                 | 1558.8508 | 2.34932796 | 0.03256204 |
| NDFGNYNQQPSNYGPMK              | HNRNPA2B1<br>HNRPA2B1                       | 1972.8374 | -5.8499087 | 0.04761849 |
| YGGGNYGPGSGGSGGYGGRSR          | HNRNPA2B1<br>HNRPA2B1                       | 1975.8521 | -5.9237919 | 0.00580977 |
| MEVKPPPGRPQPDSGR               | HNRNPA3 HNRPA3                              | 1746.8835 | -6.8860868 | 0.01196117 |
| NVKGVPVREGDVLTLLESEREARR<br>LR | RPS28                                       | 2891.6053 | 6.52259505 | 0.00255902 |
| ATVTATTKVPEIRDVTR              | RUVBL2 INO80J<br>TIP48 TIP49B CGI-<br>46    | 1857.032  | -1.0857608 | 0.04479179 |
| SLYPSLEDLKVVDKVIQAQT           | SDCBP MDA9<br>SYCL                          | 2146.1522 | 4.88771696 | 0.03030777 |
| AASAARGAAALRRSINQPVA           | SLIRP C14orf156<br>DC23 DC50<br>PD04872     | 1950.0871 | -1.8124885 | 0.02294397 |
| AASAARGAAALRRSINQPVAF          | SLIRP C14orf156<br>DC23 DC50<br>PD04872     | 2097.1556 | -2.9885889 | 0.00634614 |
| SINQPVAFVR                     | SLIRP C14orf156<br>DC23 DC50<br>PD04872     | 1129.6244 | -8.3116573 | 0.02991139 |
| AGGPPKALPSTGPHSLR              | SNX30                                       | 1641.8951 | -5.6058486 | 0.00277269 |
| AAVPELLQQQEEDRSKLR             | SNX5                                        | 2109.1178 | -2.1019558 | 0.04102036 |
| KGDGPVQGIINF                   | SOD1                                        | 1243.6561 | -2.9583578 | 0.00231553 |

|                               |                                           |           |            |            |
|-------------------------------|-------------------------------------------|-----------|------------|------------|
| AANSSGQGFQNKNR                | INIP C9orf80<br>SSBIP1 HSPC043<br>HSPC291 | 1477.7022 | 2.53871574 | 0.03065232 |
| ALTSDLGKQIKLK                 | SULT1C2 SULT1C1                           | 1413.8555 | -6.8406154 | 0.04104699 |
| DEVSRIVGSVE                   | STAT1                                     | 1188.5986 | 5.71255917 | 0.01742645 |
| GSNRGASQAGMTGYGRPRQ           | TAGLN SM22 WS3-<br>10                     | 1949.9238 | -2.4765185 | 0.04505212 |
| MGSNRGASQAGMTGYGRPRQIIS       | TAGLN SM22 WS3-<br>10                     | 2394.1645 | -10.075668 | 0.01865423 |
| VIGLQMGSNRGASQAGMTGYGR<br>PRQ | TAGLN SM22 WS3-<br>10                     | 2591.2809 | -3.0168577 | 0.02161172 |
| AAVKTLNPKAEVARAQA             | CCT6A CCT6 CCTZ                           | 1736.9897 | -7.6446528 | 0.00117663 |
| AAVKTLNPKAEVARAQAA            | CCT6A CCT6 CCTZ                           | 1808.0268 | -1.5252089 | 0.00766892 |
| MQPASAKWYDRRDYVF              | PTGES3 P23 TEBP                           | 2031.9625 | 6.42437545 | 0.02712346 |
| SVAGVHTVPGSPQARHR             | TNS1 TNS                                  | 1754.9288 | 3.53741073 | 0.02773984 |
| AGLALEIRSL                    | TMEM205<br>UNQ501/PRO1018                 | 1041.6182 | -2.1155024 | 0.04043653 |
| ASASGAMAKHEQILV               | VAPA VAP33                                | 1511.7766 | -6.379443  | 0.00605744 |
| ALSDADVQKQIK                  | ATP6V1E1 ATP6E<br>ATP6E2                  | 1314.7143 | -2.0802787 | 0.02827731 |
| GHKLGGLGLEFQA                 | VDAC1 VDAC                                | 1268.6877 | -6.4842381 | 0.03475725 |
| GGPGTASRP                     | VIM                                       | 798.39842 | 4.9100206  | 0.00282526 |
| GGPGTASRPSS                   | VIM                                       | 972.46247 | 2.00400427 | 0.04507893 |
| TVETRDGQVIN                   | VIM                                       | 1230.6204 | 5.28318367 | 0.0390112  |
| ATTAAPAGGARN                  | YIPF3 C6orf109<br>KLIP1                   | 1056.5312 | 1.99850275 | 0.04933627 |
