# Supplementary material for: Tat-hspb1 Suppresses Clear Cell Renal Cell Carcinoma (ccRCC) Growth via Lysosomal Membrane Permeabilization
Source: MDPI journal article supplement (doi:10.3390/cancers14225710), 2022-11-21
Supplement: s1 [file s1]

Table S1. Baseline characteristics

|                                      | Patient-1  | Patient-2  | Patient-3  |
|--------------------------------------|------------|------------|------------|
| Age                                  | 61         | 60         | 65         |
| Gender                               | Female     | Male       | male       |
| BMI                                  | 23         | 25.4       | 23.8       |
| Hypertension                         | No         | No         | No         |
| Diabetes                             | No         | No         | No         |
| Pre-nephrectomy<br>creatinine, mg/dl | 0.65       | 0.90       | 0.63       |
| Tumor size, cm                       | 2          | 3          | 4.7        |
| Histologic subtype                   | Clear cell | Clear cell | Clear cell |
| WHO/ISUP grade                       | 1          | 2          | 1          |
| Pathologic T stage                   | T1a        | T1a        | T1b        |
| Pathologic N status                  | N0         | N0         | N0         |
| Pathologic M status                  | M0         | M0         | M0         |
