# Supplementary material for: Tat-hspb1 Suppresses Clear Cell Renal Cell Carcinoma (ccRCC) Growth via Lysosomal Membrane Permeabilization
Source: Cancers (Basel). 2022 Nov 21;14(22):5710. doi: 10.3390/cancers14225710 (PMC9688814; doi:10.3390/cancers14225710)
Supplement: Supplementary file 1 [file cancers-14-05710-s001.zip]

Archive with 4 entries (4 files):
- Fig. S1.pdf
- Fig. S2.pdf
- Table S1.pdf
- Table S2.pdf
