# Supplementary figures and images for: Tat-hspb1 Suppresses Clear Cell Renal Cell Carcinoma (ccRCC) Growth via Lysosomal Membrane Permeabilization
Source: MDPI journal article supplement (doi:10.3390/cancers14225710), 2022-11-21

Figure. S1 The effect of Tat-hspb1 and Sunitinib

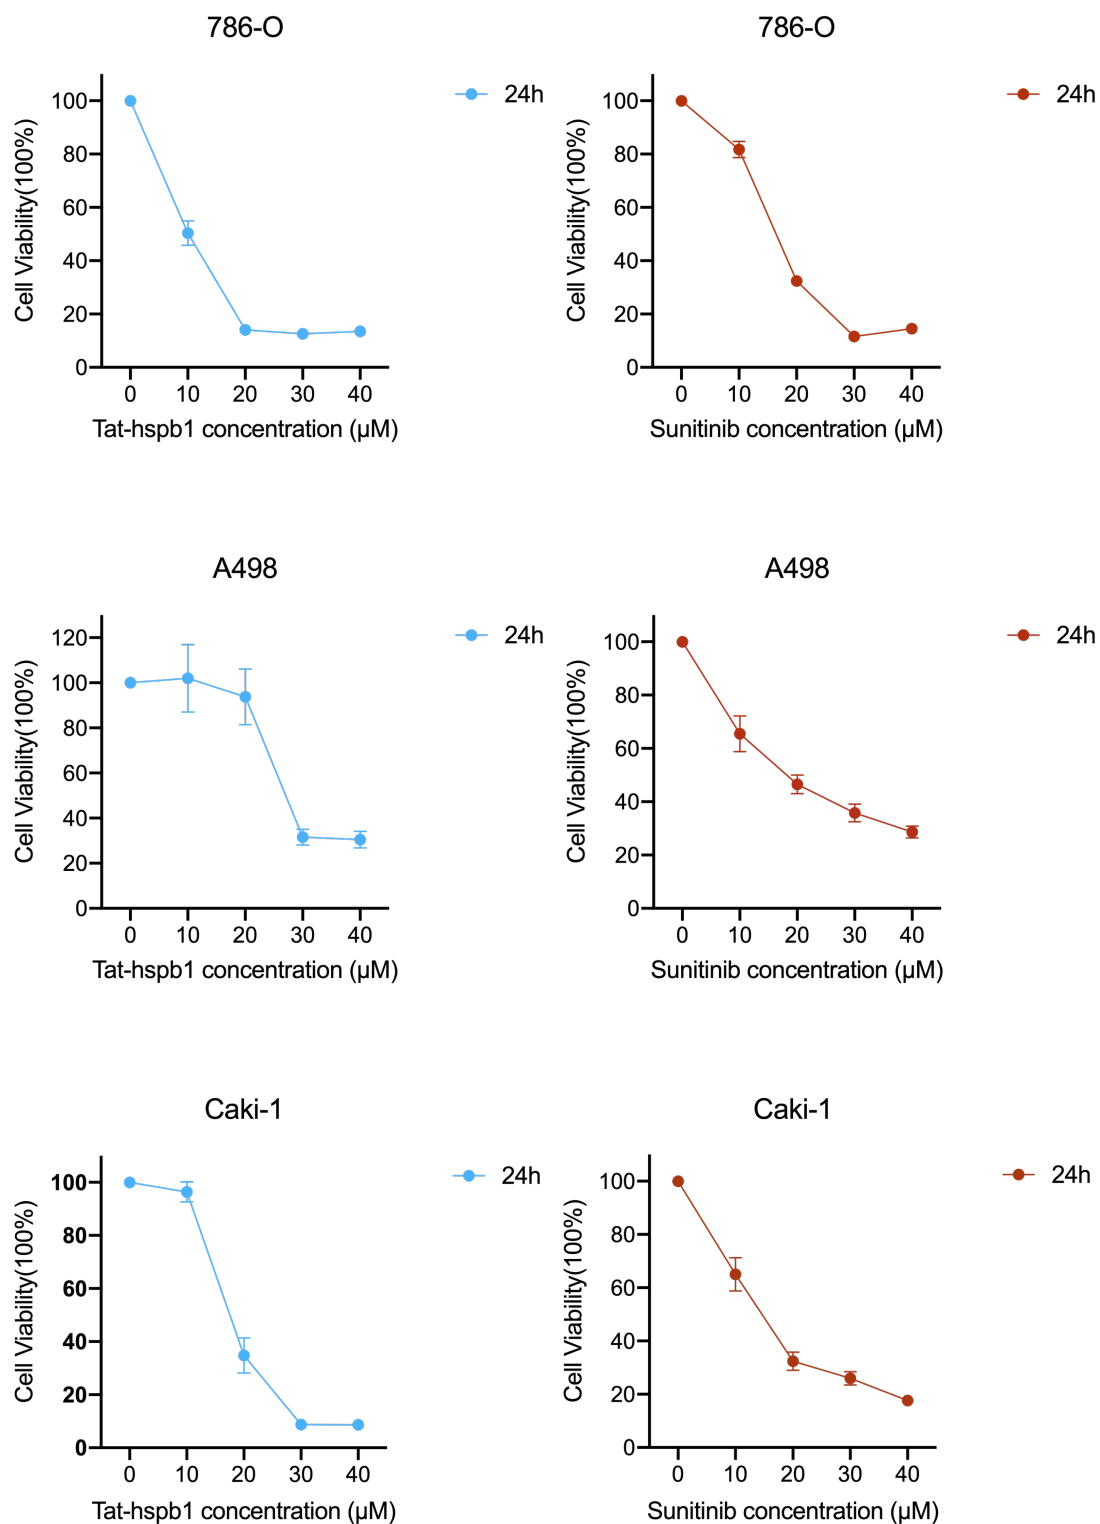

Supplement: s1 [file s1]

Whole image of WB in Fig.4C

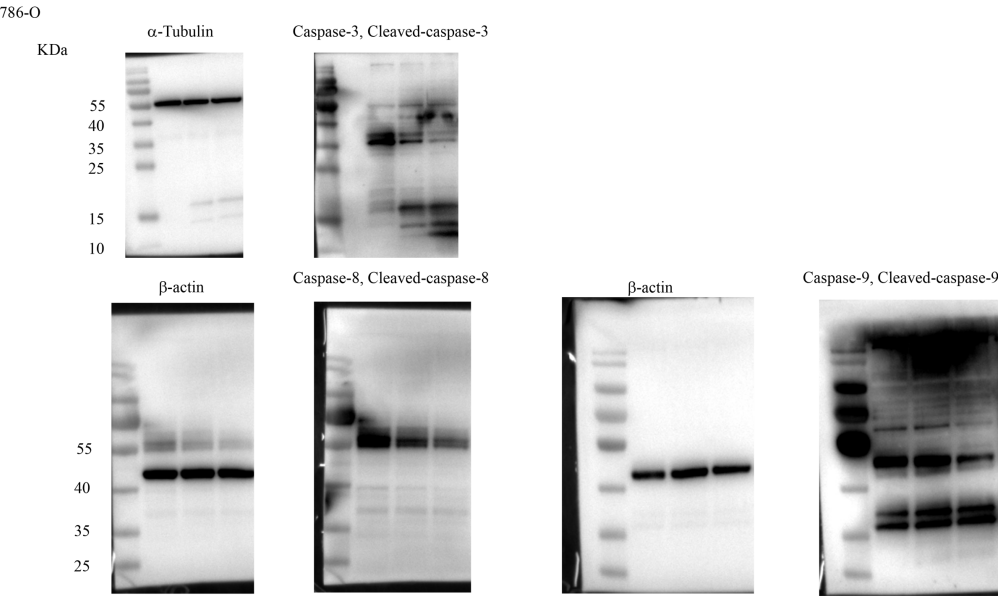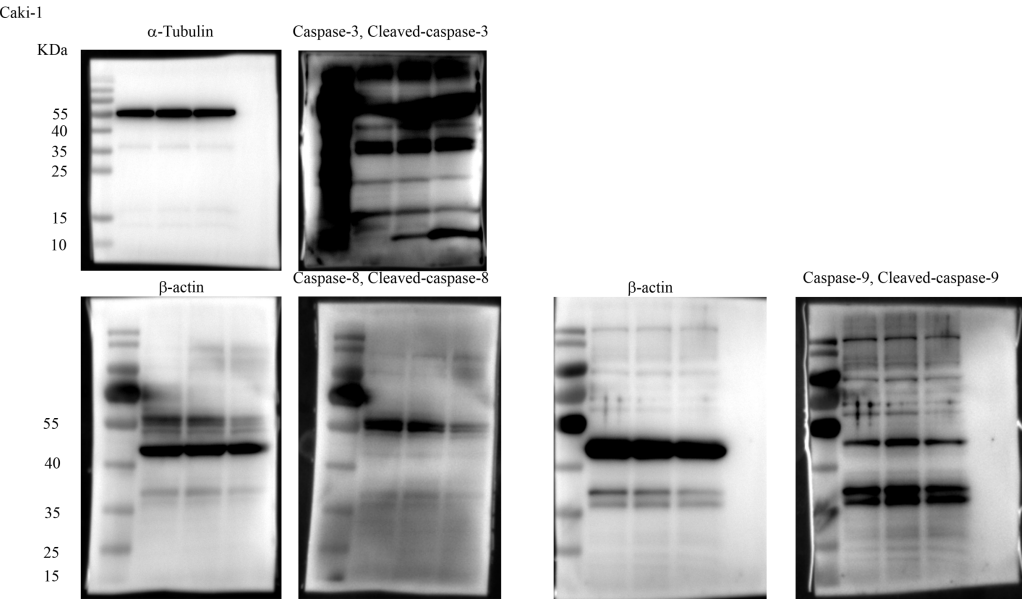

Supplement: s1 [file s1]
